# Supplementary material for: Synthesis and Biological Evaluation of Novel Pyrimidine Amine Derivatives Bearing Bicyclic Monoterpene Moieties
Source: MDPI journal article supplement (doi:10.3390/molecules27228104), 2022-11-21
Supplement: s1 [file s1]

# Synthesis and biological evaluation of novel pyrimidine amine derivatives bearing bicyclic monoterpene moieties

Mingguang Zhang<sup>1</sup>, Yunyun Wang<sup>2</sup>, Shifa Wang<sup>3</sup>, Hongyan Wu<sup>1,\*</sup>

(1 School of Pharmacology, Jiangsu Vocational College of Medicine, Yancheng 224005, China)

(2 School of Pharmacy and Jiangsu Province Key Laboratory for Inflammation and Molecular Drug Target, Nantong University, Nantong 226001, China)

(3 College of Chemical Engineering, Nanjing Forestry University, Nanjing 210037, China)

\* Correspondence: why20133055@163.com (H.W.)

Spectral Copies of HRMS, <sup>1</sup>H, <sup>13</sup>C NMR Data Obtained in this Study

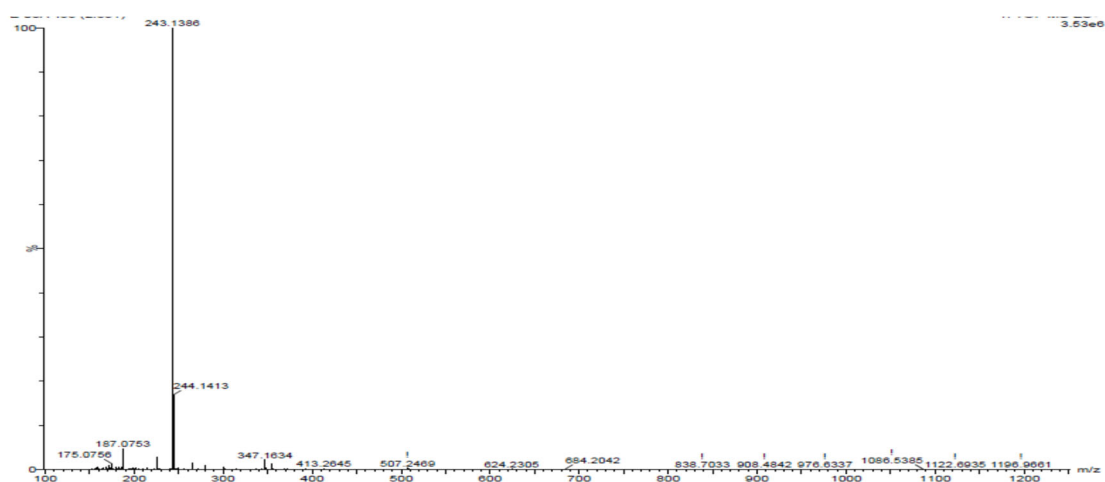

Figure S1. HRMS spectrum of compound 1a

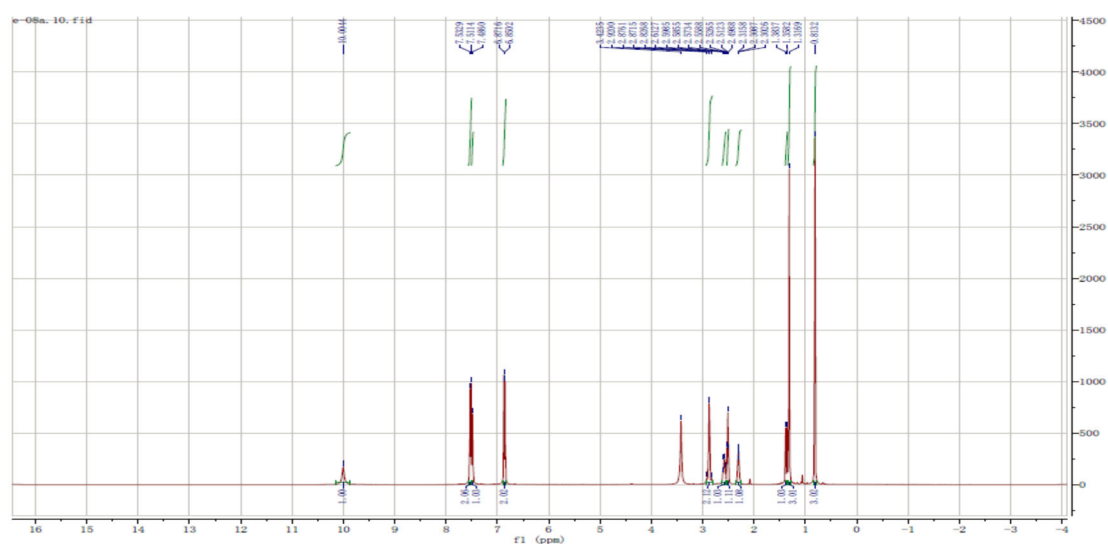

Figure S2. <sup>1</sup>H NMR spectrum of compound 1a

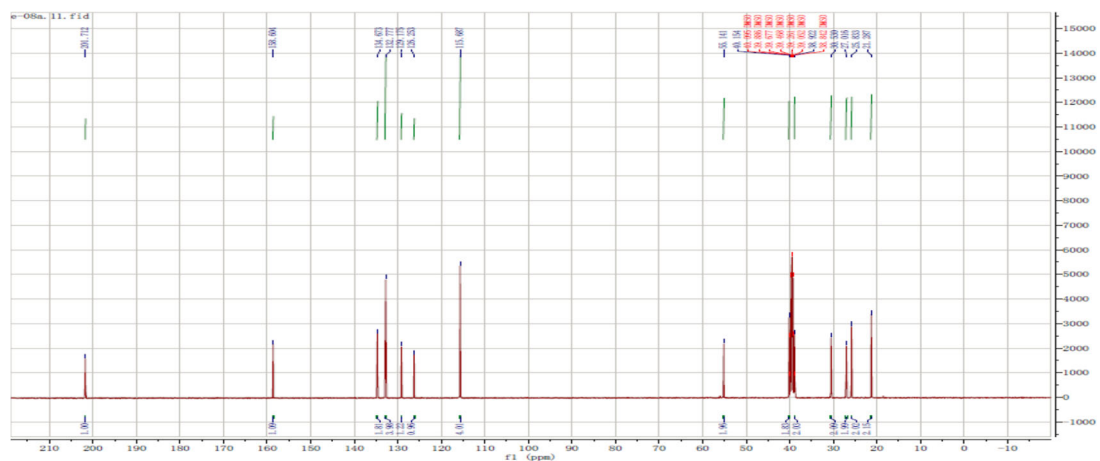

Figure S3. <sup>13</sup>C NMR spectrum of compound **1a**

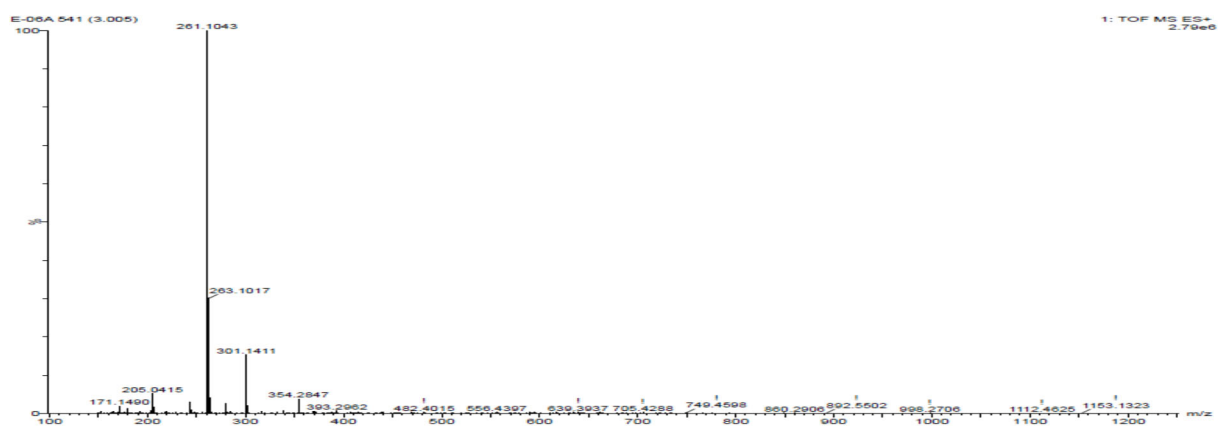

Figure S4. HRMS spectrum of compound **1b**

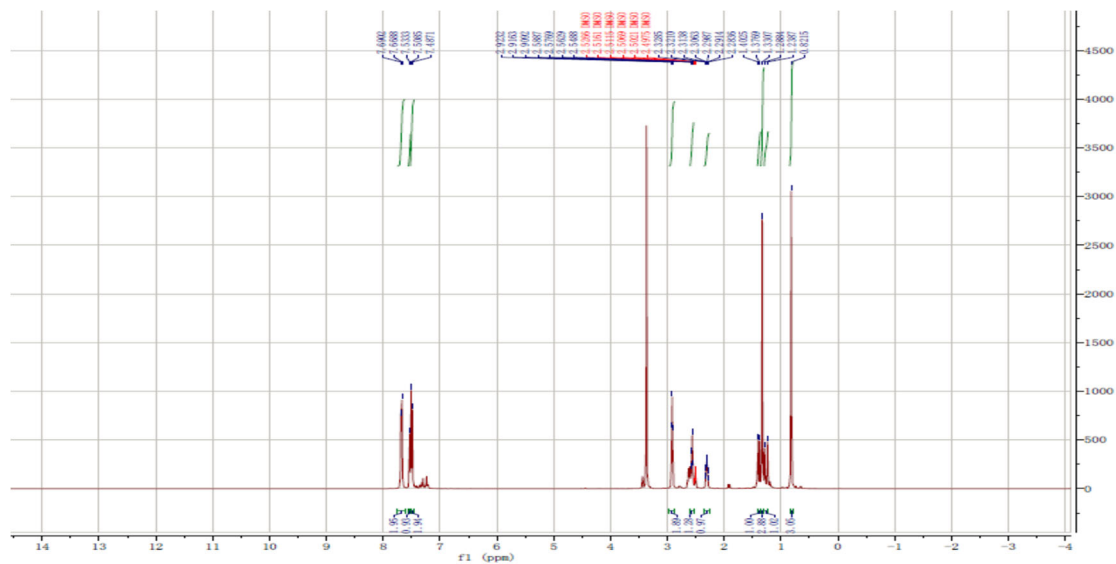

Figure S5. <sup>1</sup>H NMR spectrum of compound **1b**

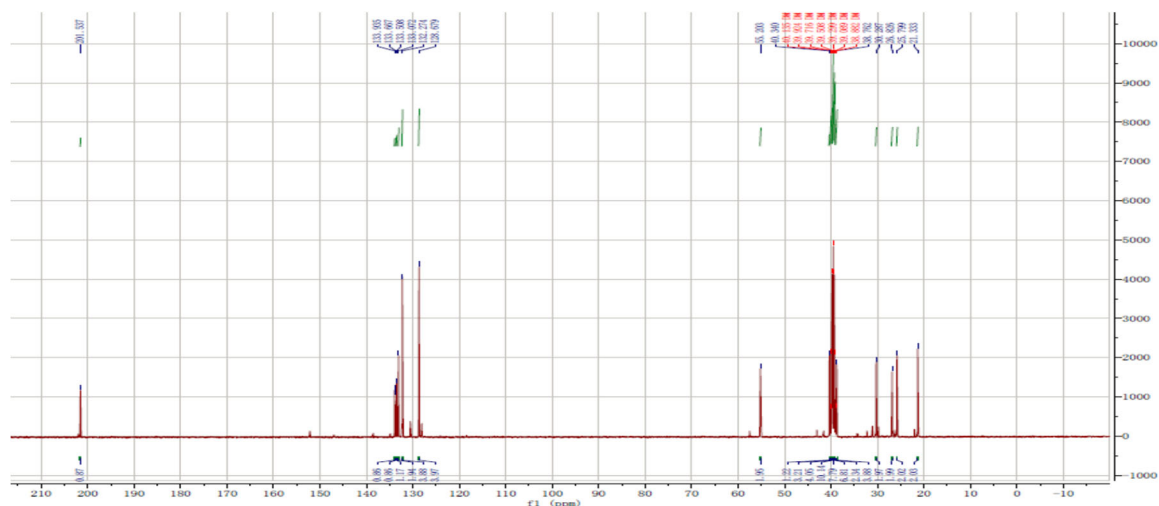

Figure S6. <sup>13</sup>C NMR spectrum of compound **1b**

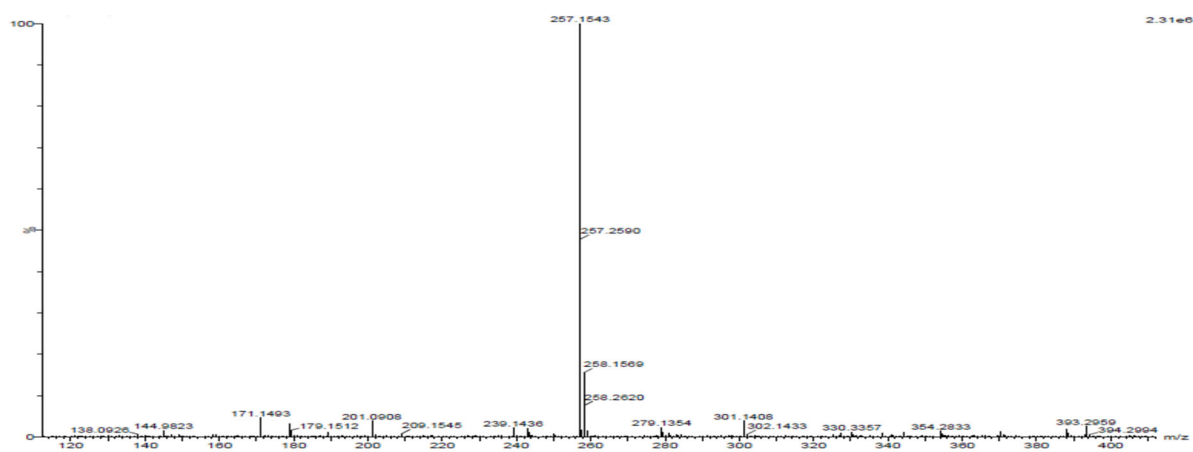

Figure S7. HRMS spectrum of compound **1c**

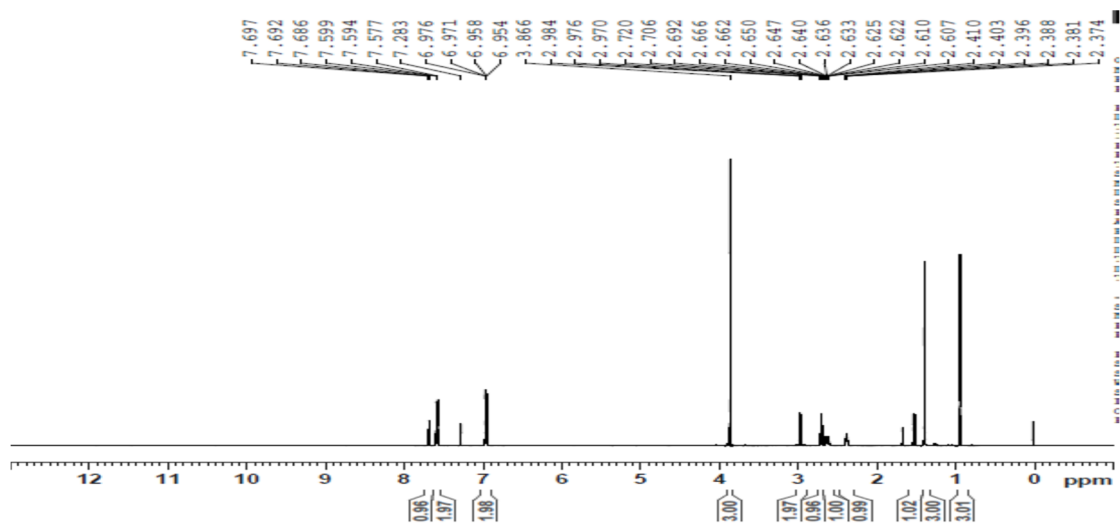

Figure S8. <sup>1</sup>H NMR spectrum of compound **1c**





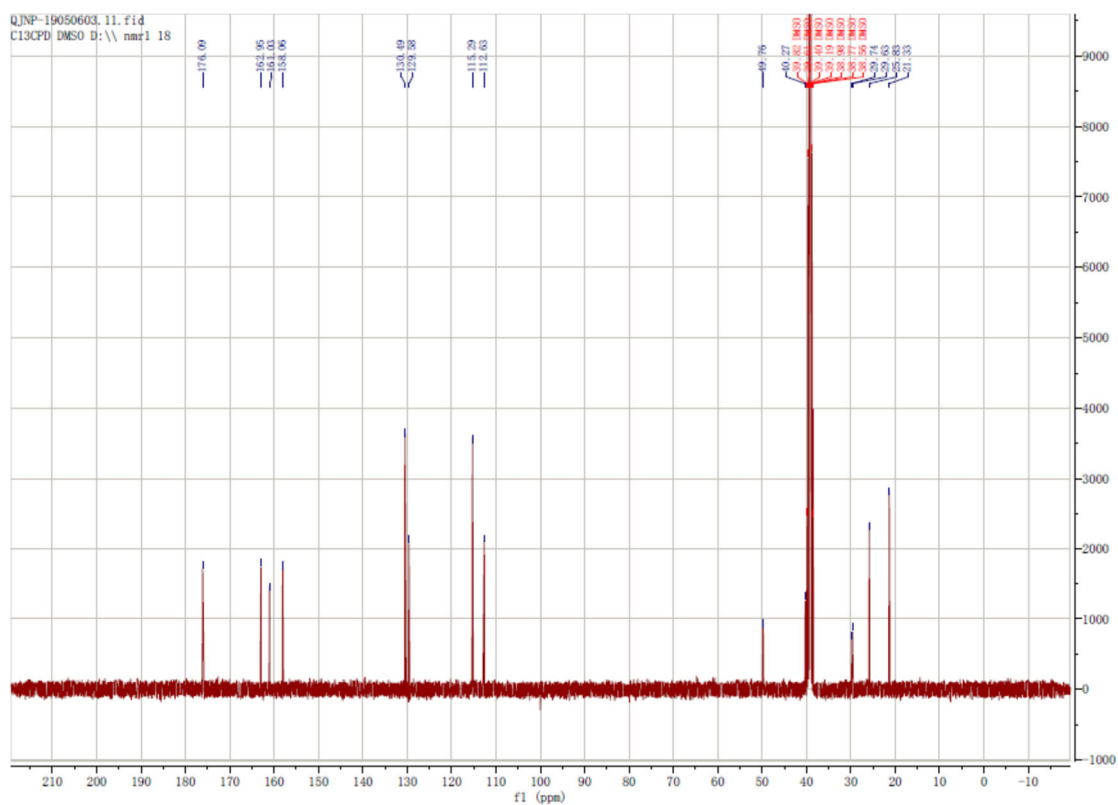

Figure S15.  $^{13}\text{C}$  NMR spectrum of compound **1e**

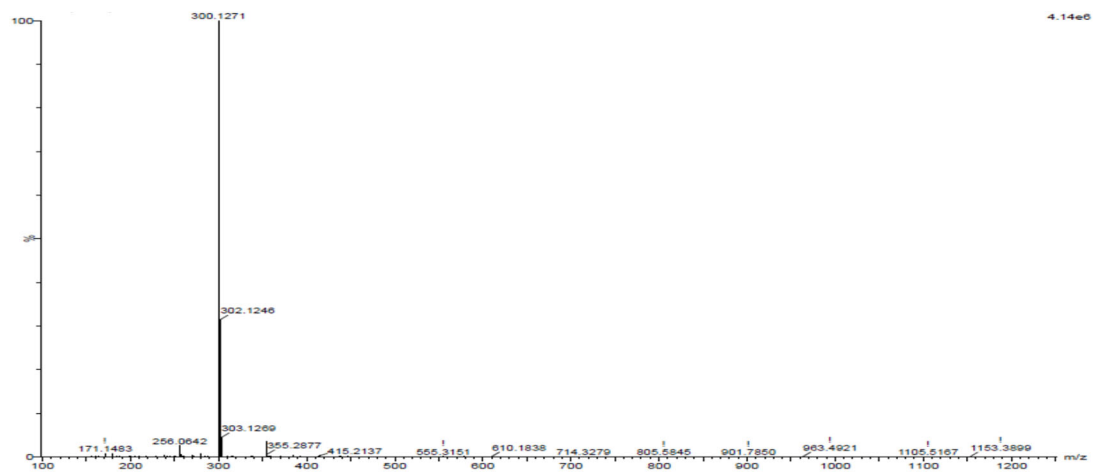

Figure S16. HRMS spectrum of compound **1f**

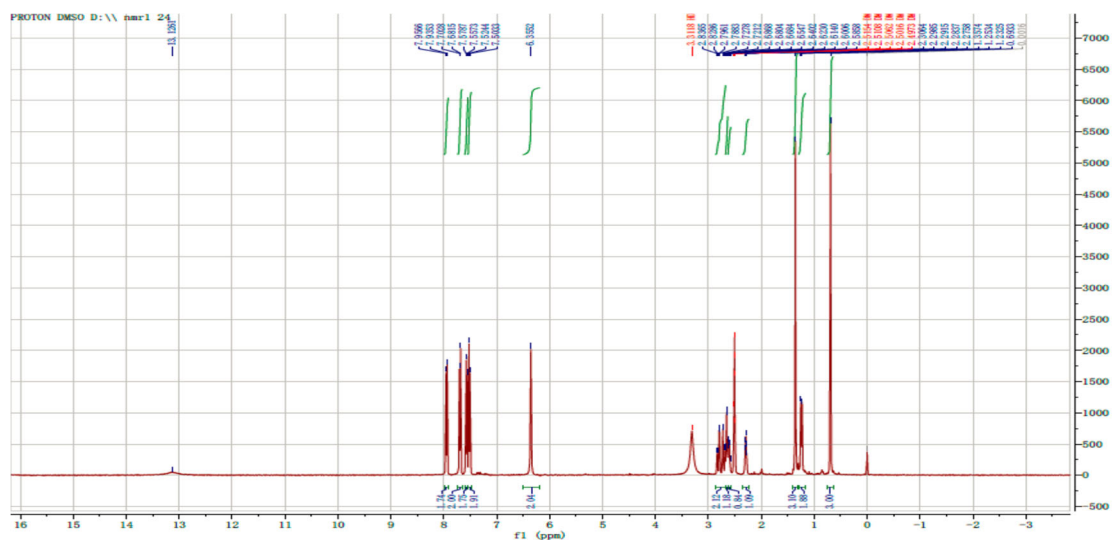

Figure S17.  $^1\text{H}$ NMR spectrum of compound **1f**

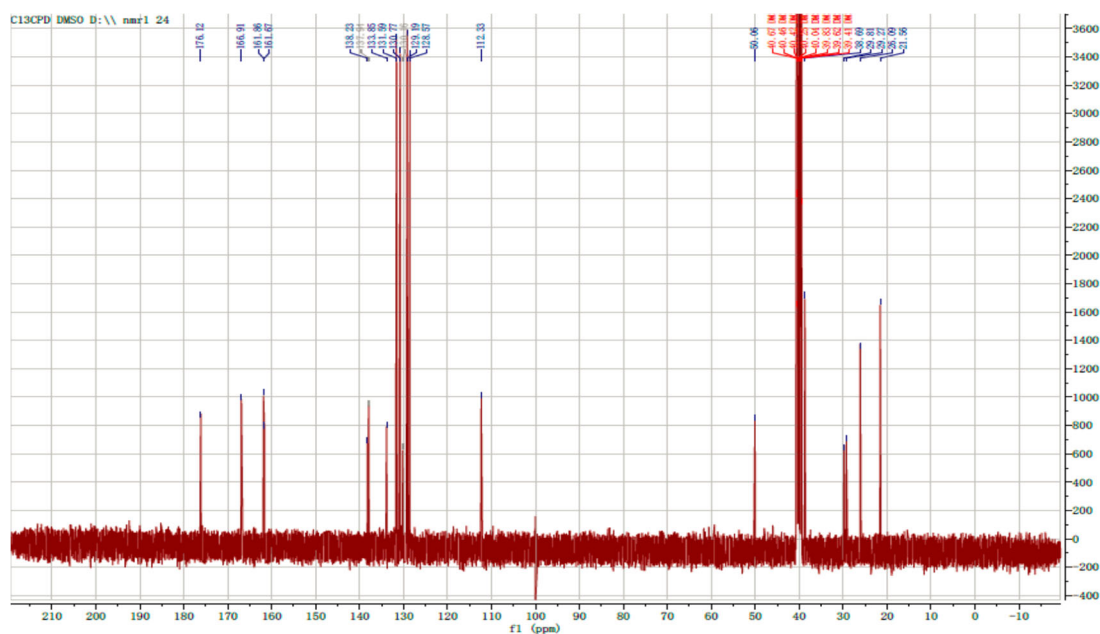

Figure S18.  $^{13}\text{C}$  NMR spectrum of compound **1f**

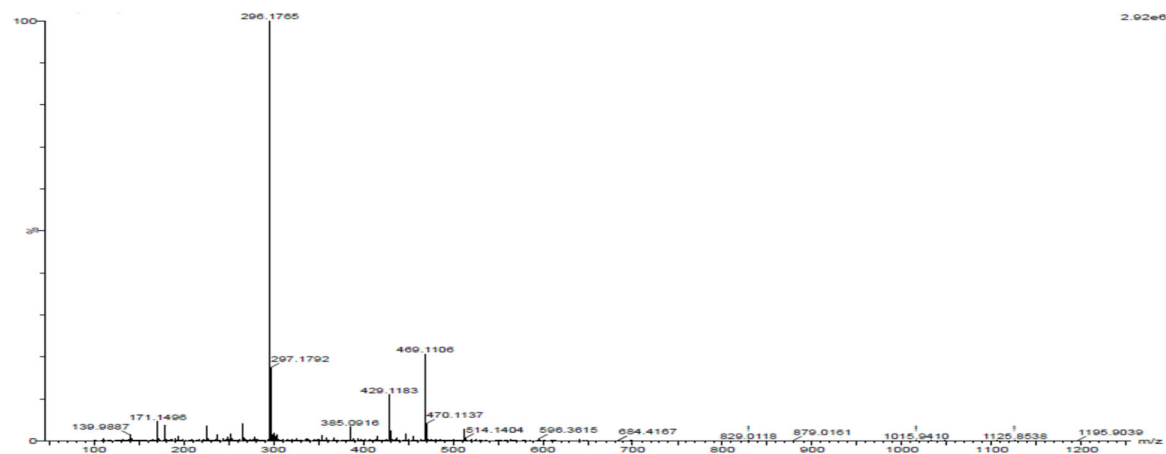

Figure S19. HRMS spectrum of compound **1g**

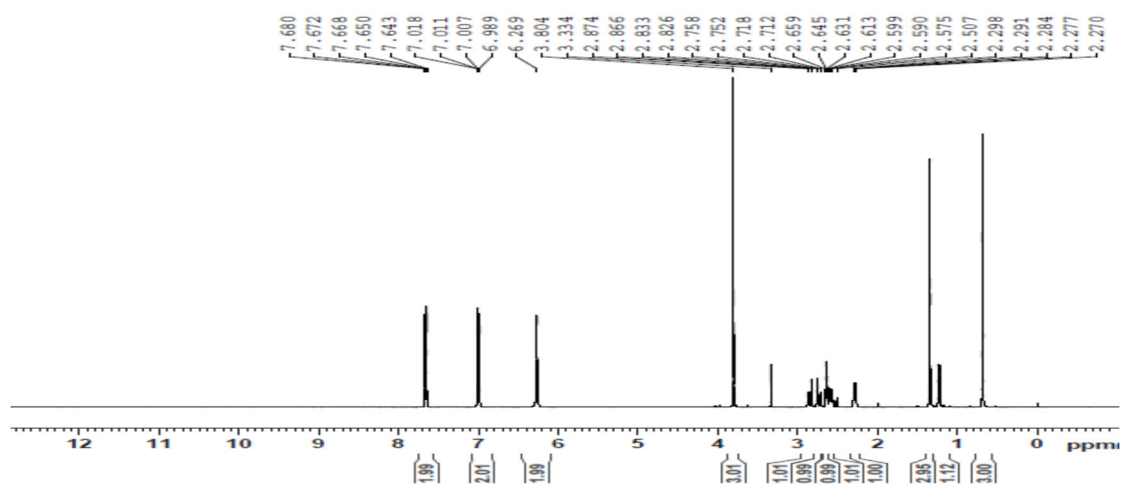

Figure S20. <sup>1</sup>H NMR spectrum of compound **1g**

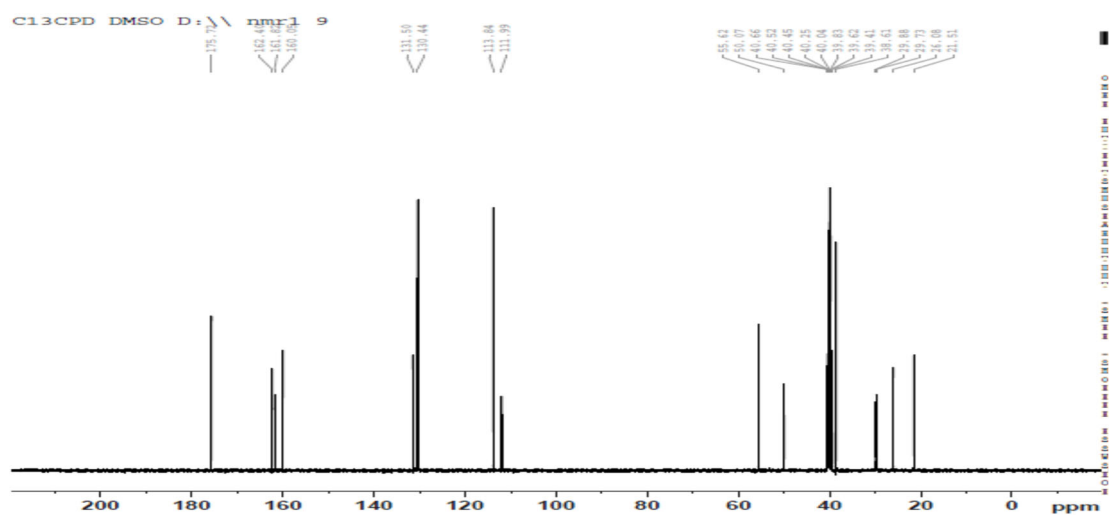

Figure S21. <sup>13</sup>C NMR spectrum of compound **1g**

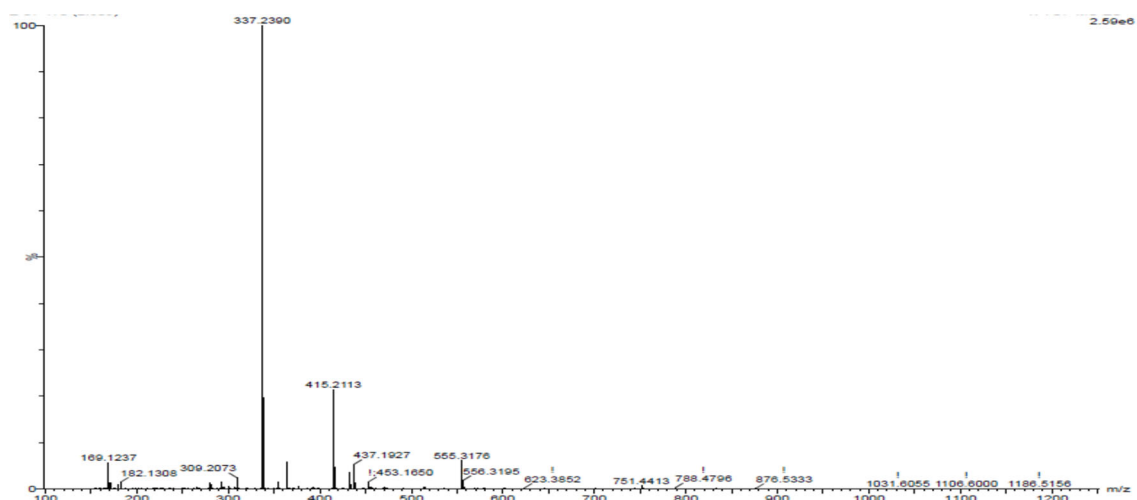

Figure S22. HRMS spectrum of compound **1h**



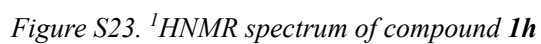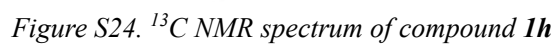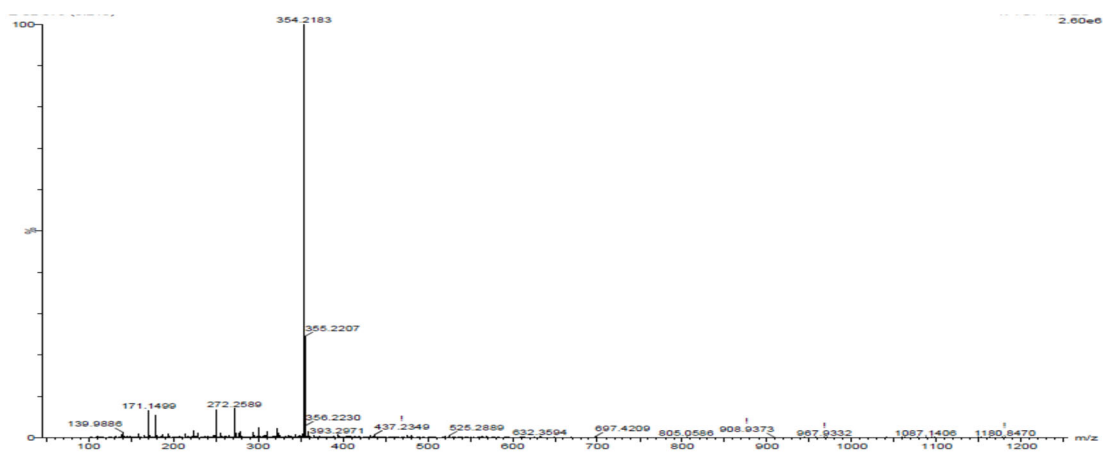

C13CPD DMSO D:C1=CC=C(C=C1)C2=CC=CC=C2 nmr 1 44

175.62  
160.40  
160.11  
131.65  
130.48  
113.93  
111.88  
71.20  
58.35  
55.66  
50.25  
40.73  
40.66  
40.53  
40.45  
40.25  
40.04  
39.83  
31.62  
31.41  
28.81  
28.77  
25.78  
21.07  
21.55  
0.57

ppm

Figure S27.  $^{13}\text{C}$  NMR spectrum of compound **1i**



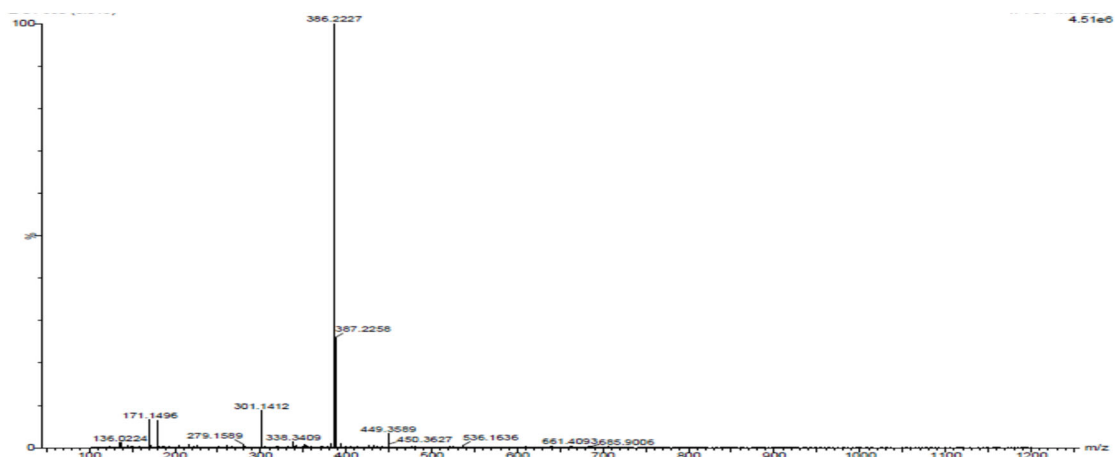

Figure S31. HRMS spectrum of compound **1k**

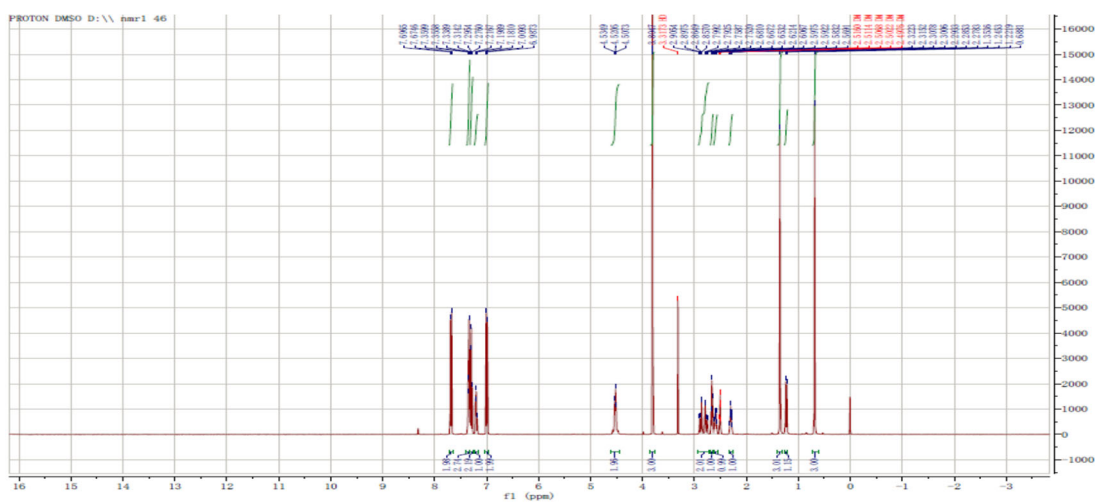

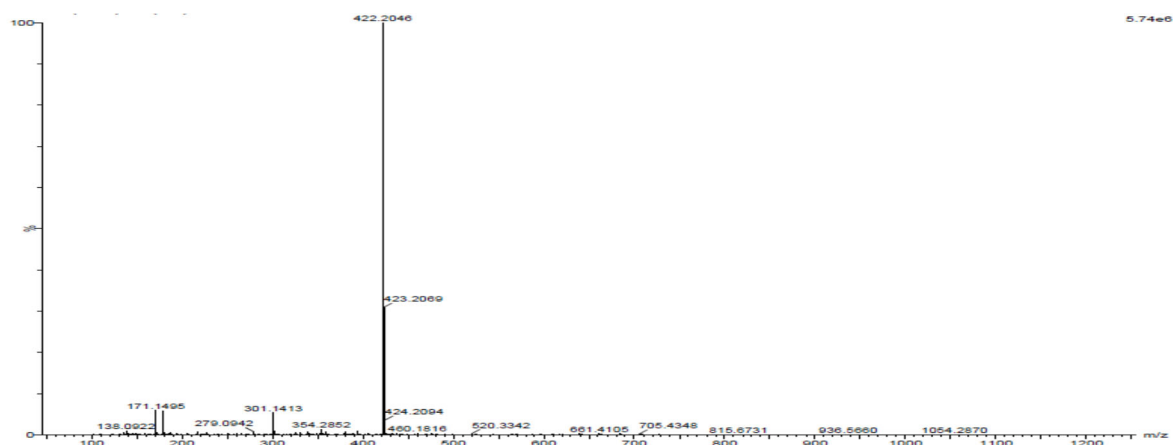

Figure S34. HRMS spectrum of compound 11

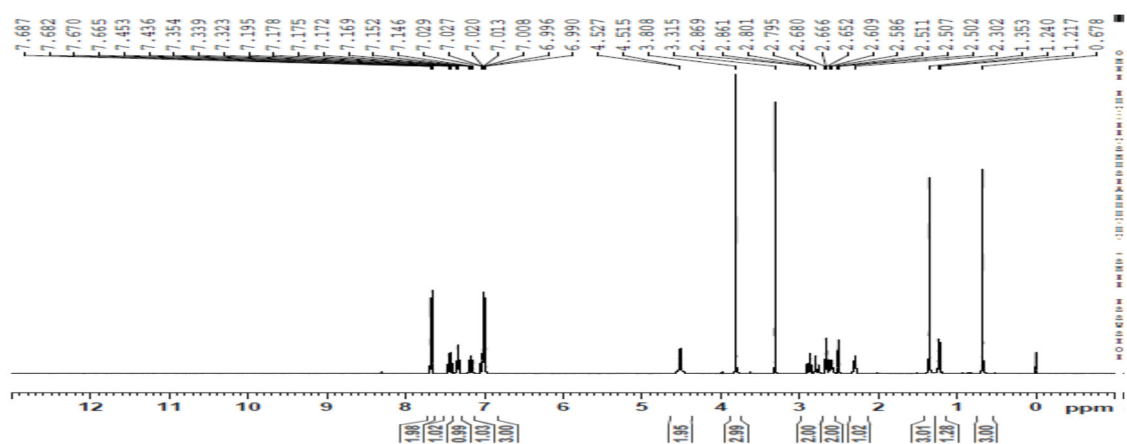

Figure S35. <sup>1</sup>H NMR spectrum of compound 11

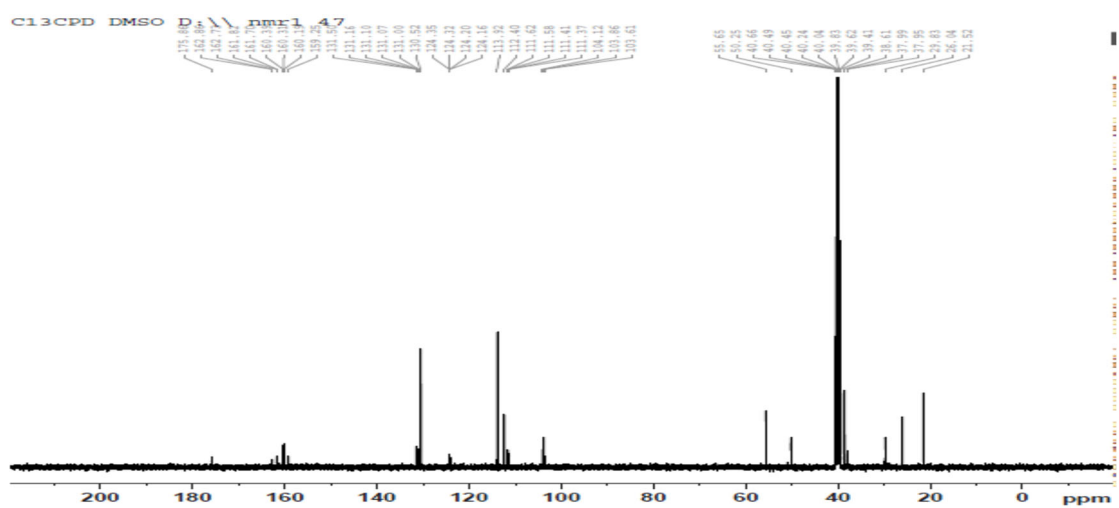

Figure S36. <sup>13</sup>C NMR spectrum of compound 11

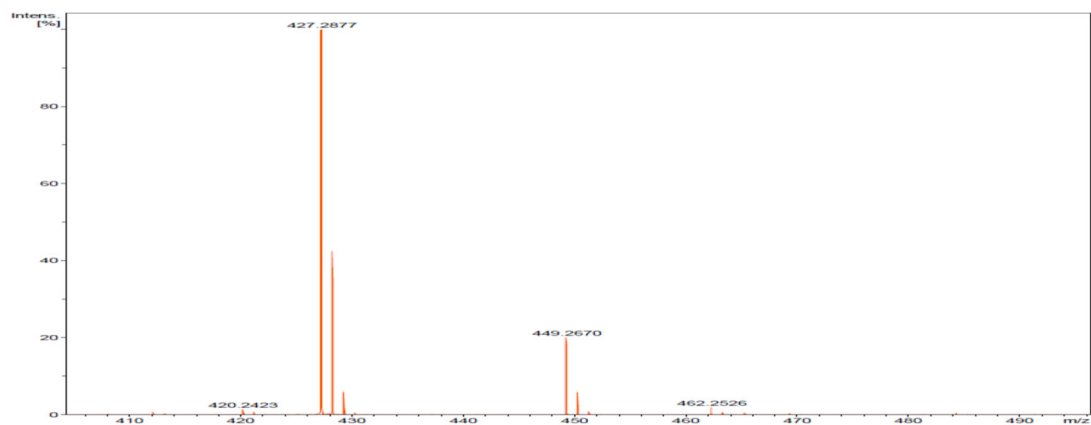

Figure S37. HRMS spectrum of compound **1m**

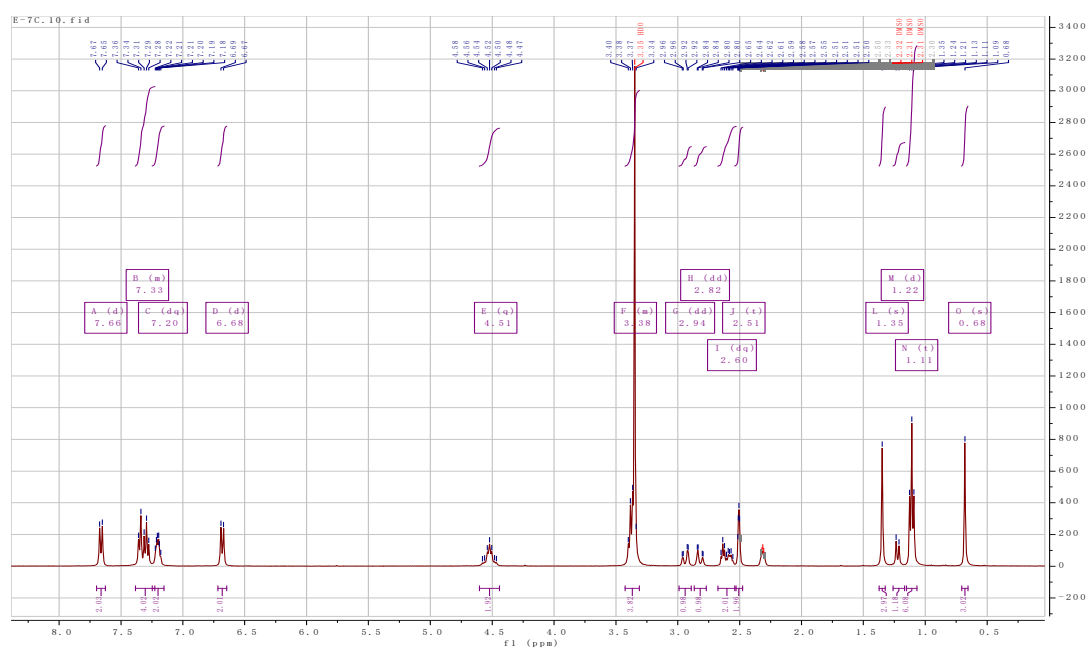

Figure S38. <sup>1</sup>H NMR spectrum of compound **1m**

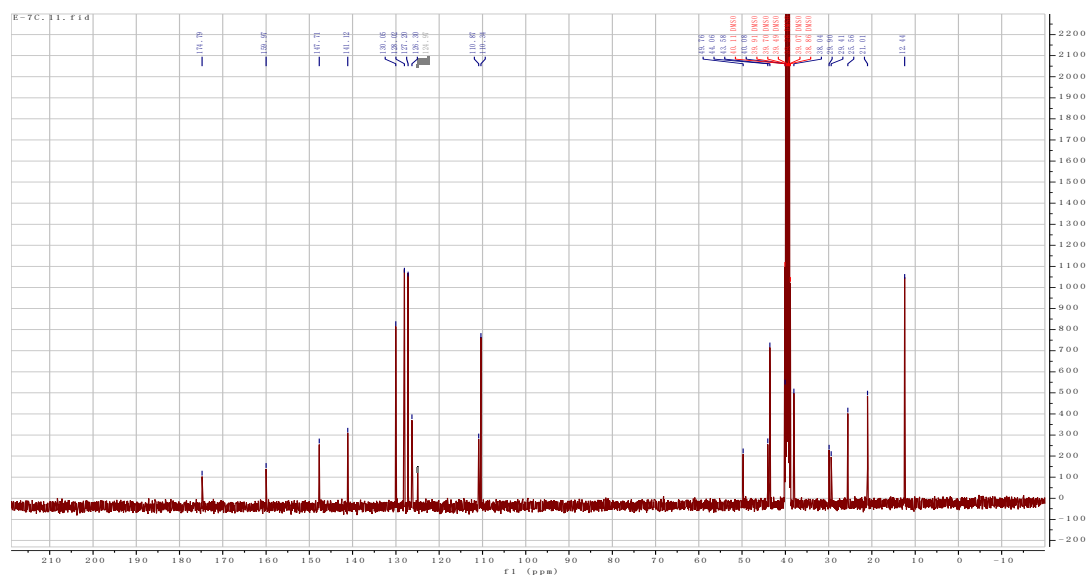

Figure S39.  $^{13}\text{C}$  NMR spectrum of compound **1m**

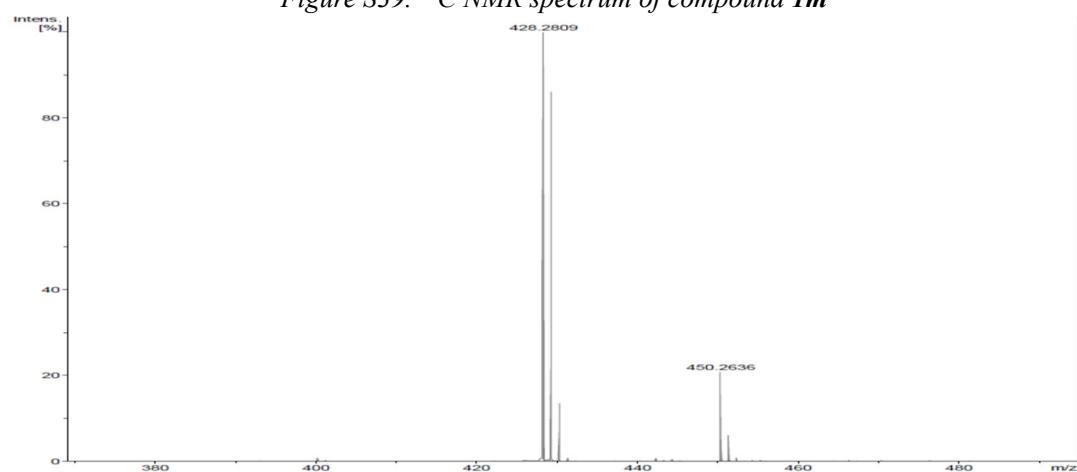

Figure S40. HRMS spectrum of compound **1n**

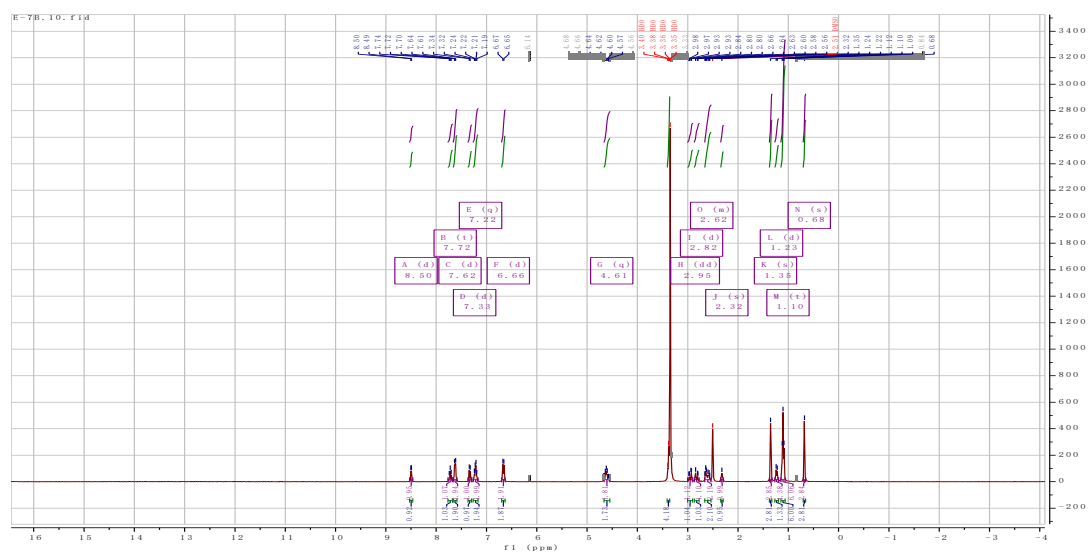

Figure S41.  $^1\text{H}$  NMR spectrum of compound **1n**

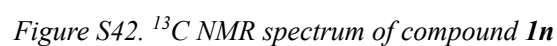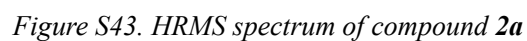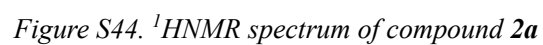



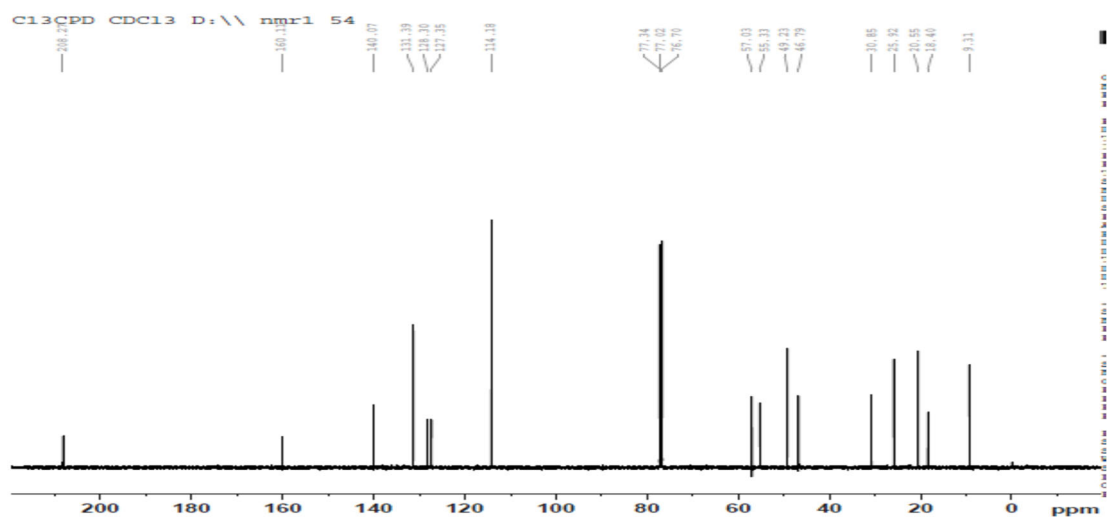

Figure S45.  $^{13}\text{C}$  NMR spectrum of compound **2a**

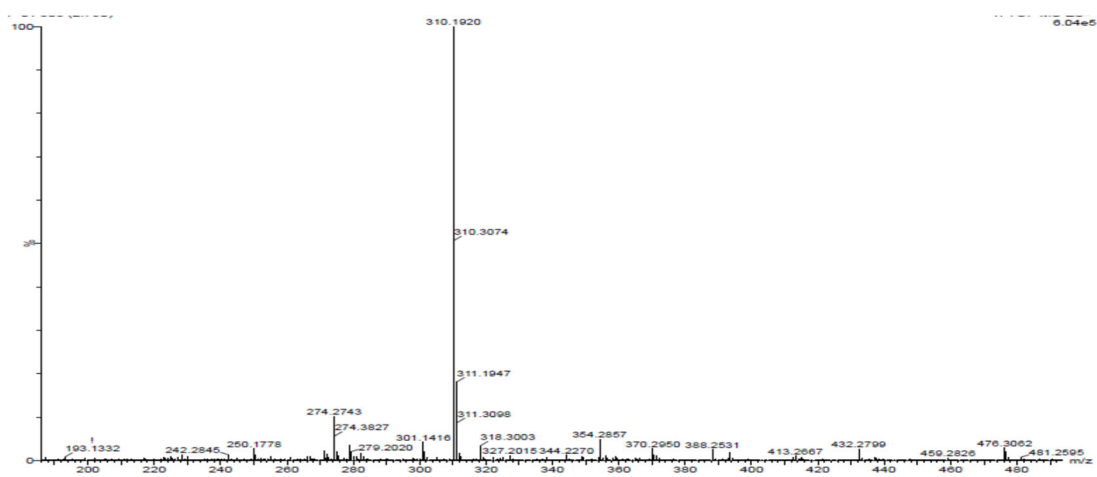

Figure S46. HRMS spectrum of compound **2b**

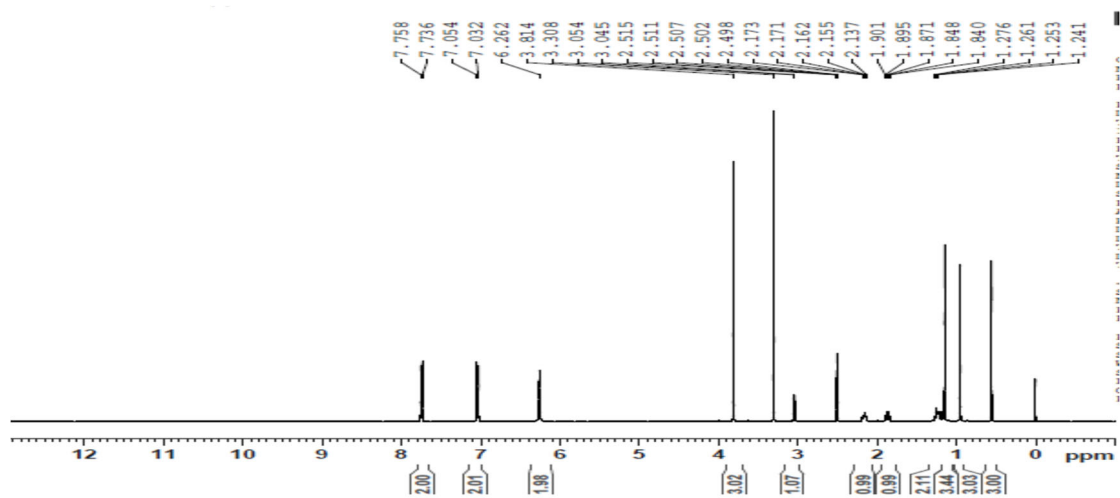

Figure S47.  $^1\text{H}$  NMR spectrum of compound **2b**

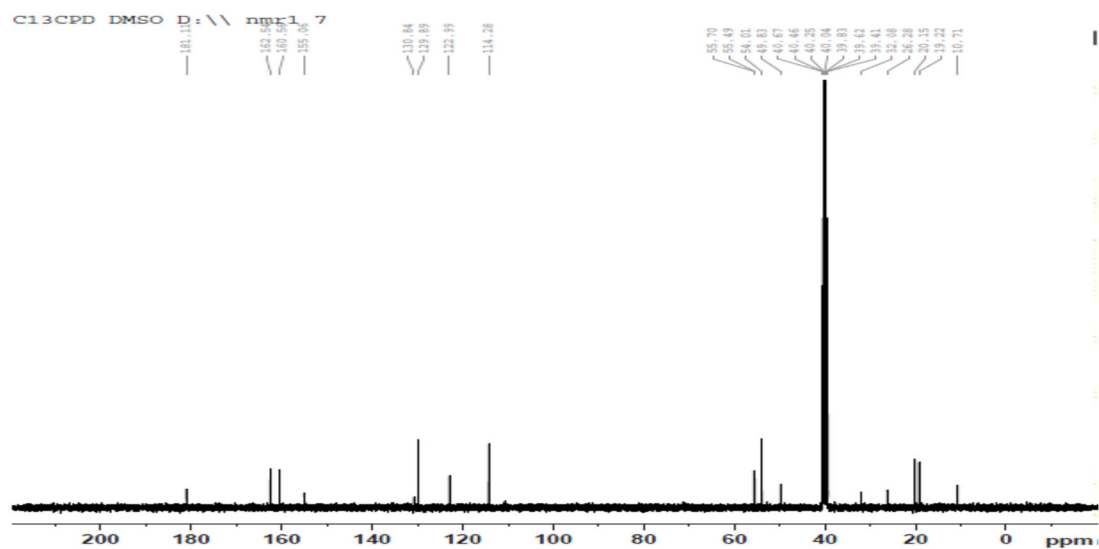

Figure S48.  $^{13}\text{C}$  NMR spectrum of compound **2b**

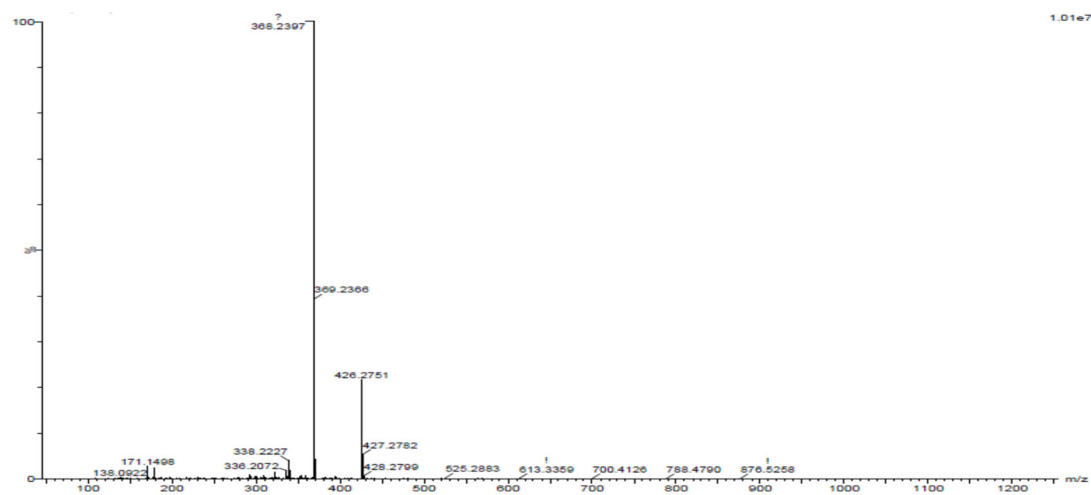

Figure S49. HRMS spectrum of compound **2c**

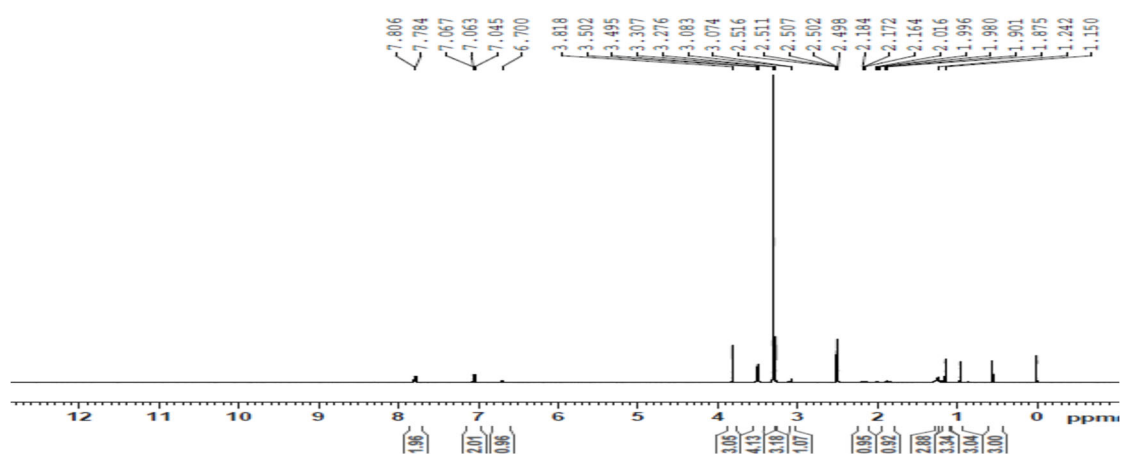

Figure S50.  $^1\text{H}$  NMR spectrum of compound **2c**

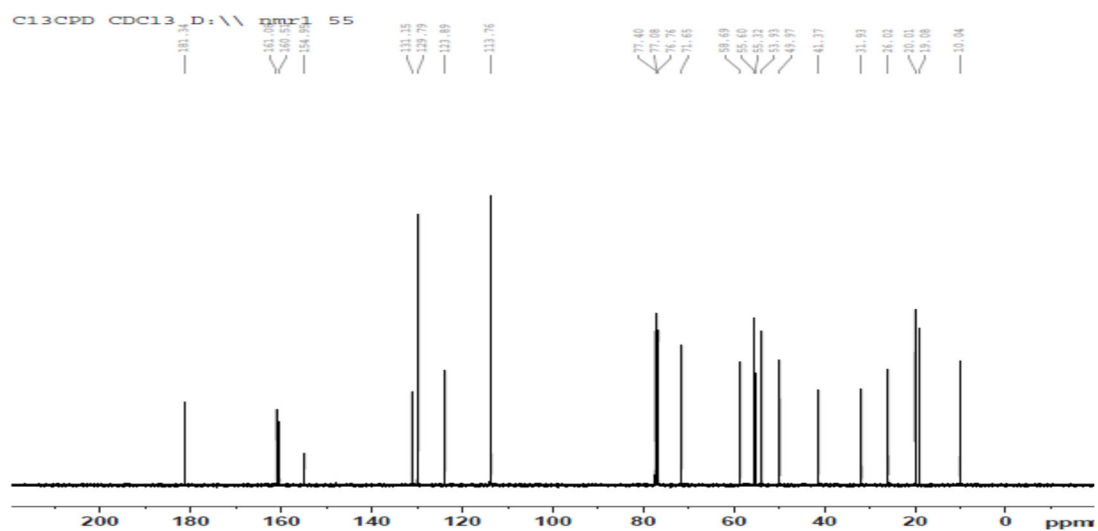

Figure S51.  $^{13}\text{C}$  NMR spectrum of compound **2c**

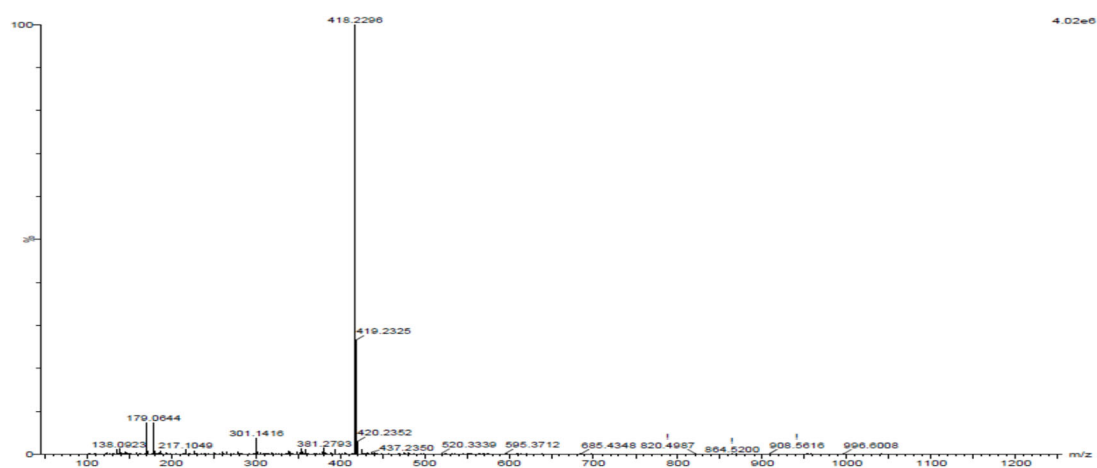

Figure S52. HRMS spectrum of compound **2d**

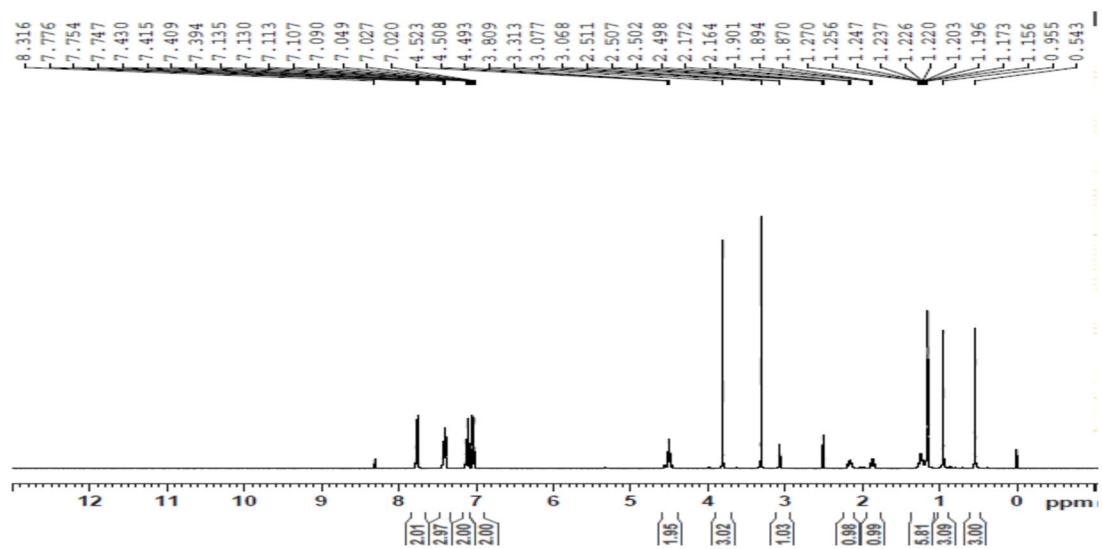

Figure S53.  $^1\text{H}$  NMR spectrum of compound **2d**

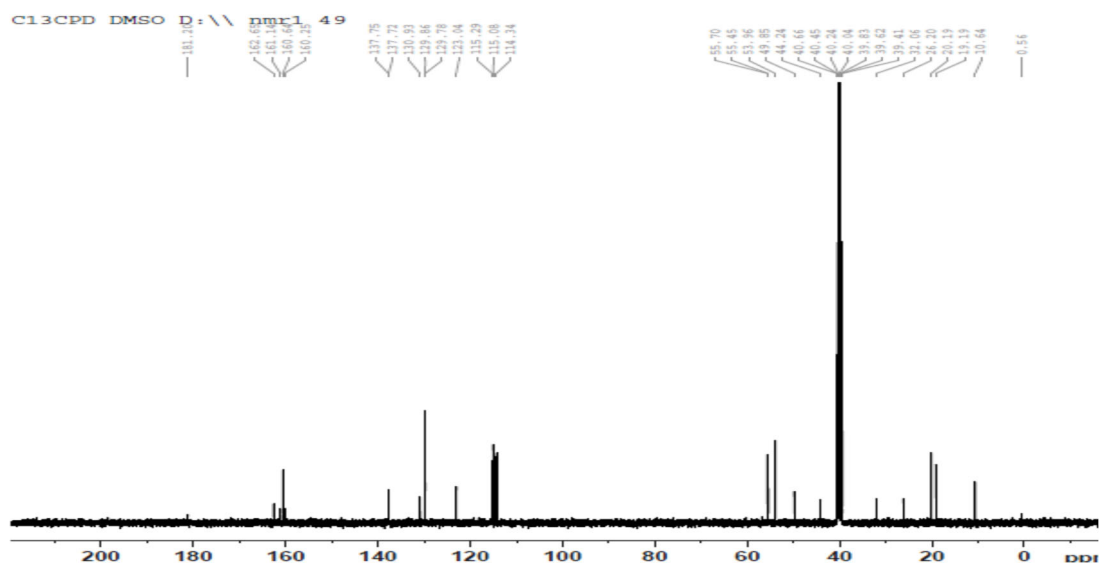

Figure S54.  $^{13}\text{C}$  NMR spectrum of compound **2d**

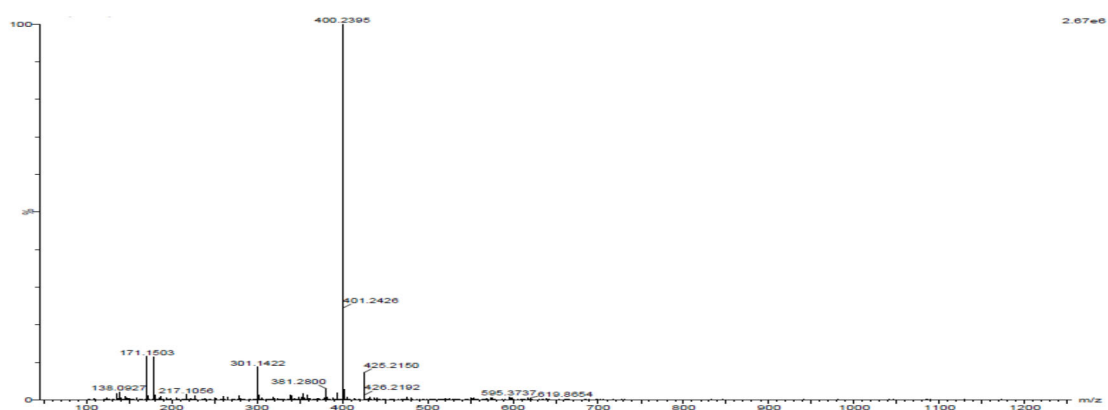

Figure S55. HRMS spectrum of compound **2e**

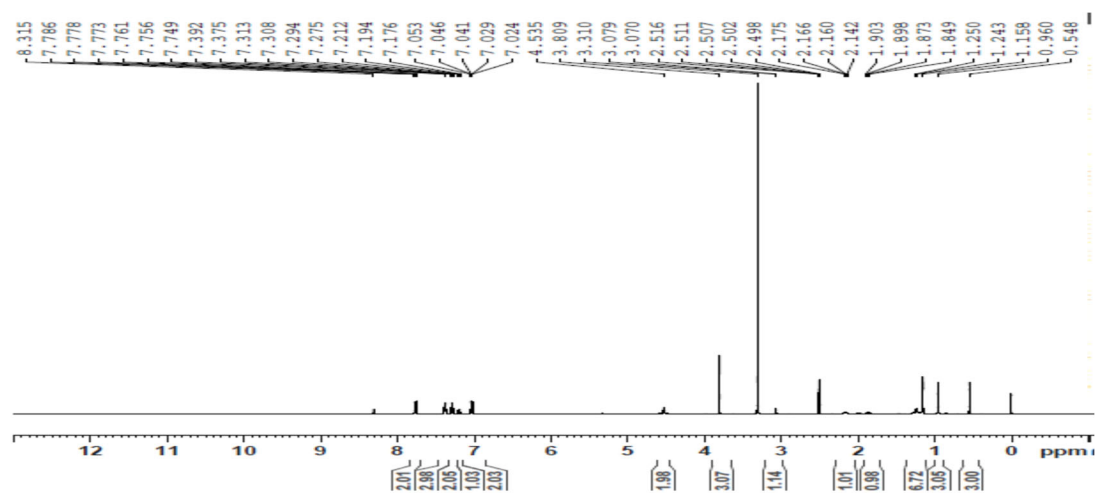

Figure S56.  $^1\text{H}$  NMR spectrum of compound **2e**

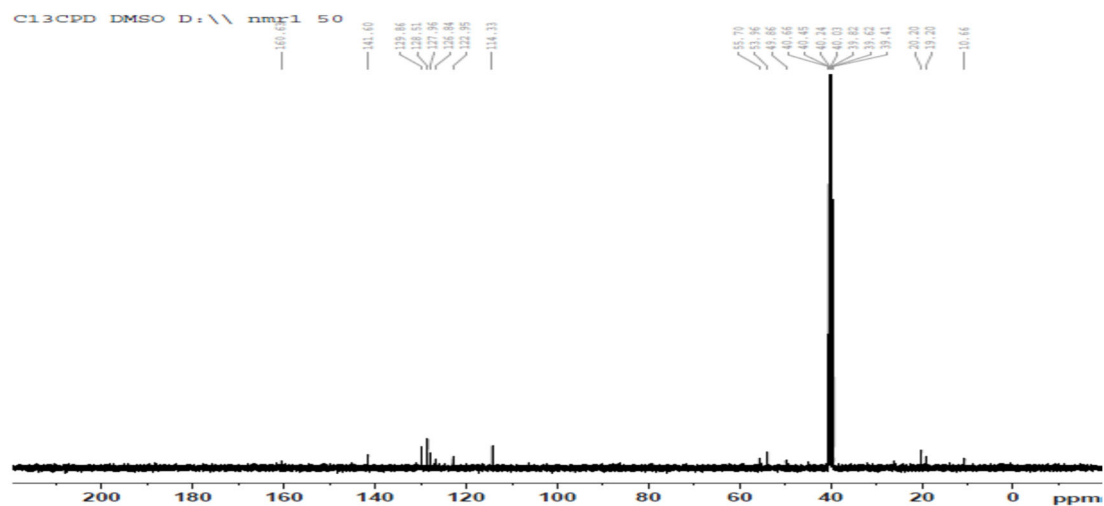

Figure S57.  $^{13}\text{C}$  NMR spectrum of compound **2e**

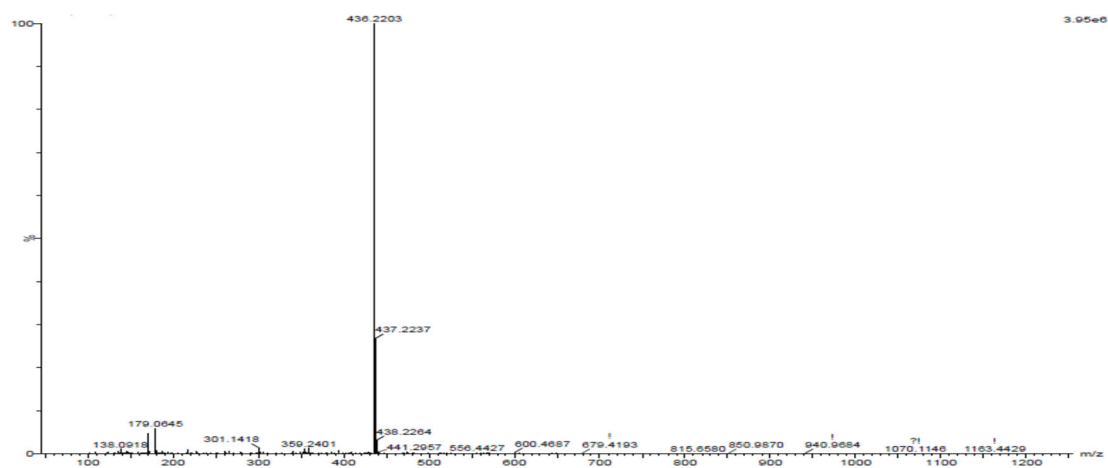

Figure S58. HRMS spectrum of compound **2f**

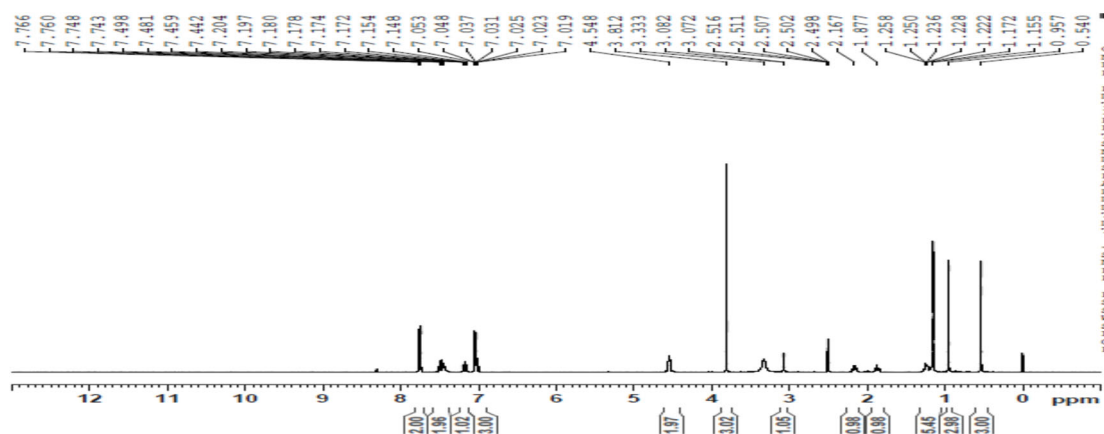

Figure S59.  $^1\text{H}$  NMR spectrum of compound **2f**

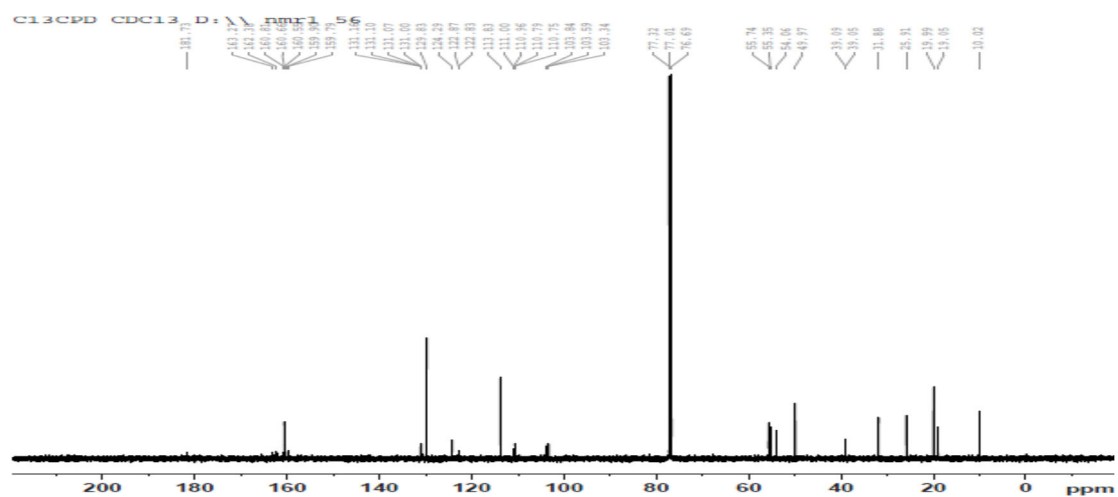

Figure S60.  $^{13}\text{C}$  NMR spectrum of compound 2f

Table S1 Flexible docking result of 1f and the standard compound (PDB ID:2AZ5)

| Compound | PDB  | Binding Residues | Docking Score |
|----------|------|------------------|---------------|
| 1f       | 2AZ5 | Ser60, Try59     | -7.964        |
| Aspirin  | 2AZ5 | Ser60, Try59     | -8.143        |
